# Supplementary material for: Time dependency of foamy virus evolutionary rate estimates
Source: PubMed Central journal article supplement (PMC4480597; doi:10.1186/s12862-015-0408-z), 2015-06-26

**Pol protein****Bayesian phylogenies**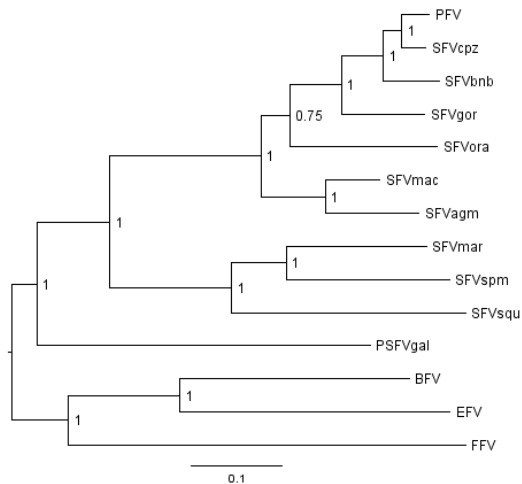**Pol nucleotide**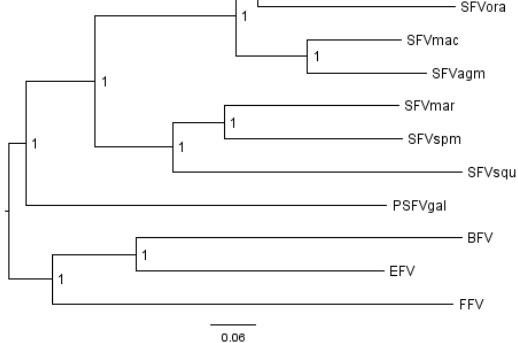**Maximum likelihood phylogenies**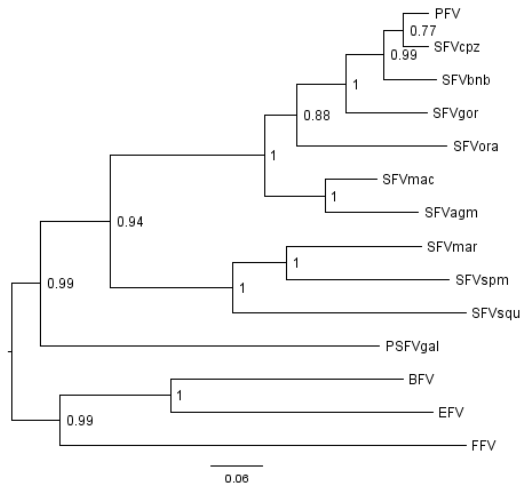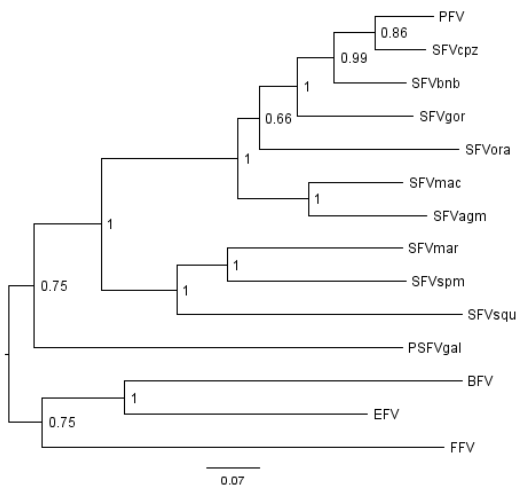

Supplement: 12862_2015_408_MOESM2_ESM.pdf [file 12862_2015_408_MOESM2_ESM.pdf]
